# Supplementary material for: Multivariate Analysis Compares and Evaluates Heat Tolerance of Potato Germplasm
Source: MDPI journal article supplement (doi:10.3390/plants13010142), 2024-01-04
Supplement: s1 [file s1]

## Supplementary Tables

**Table S1.** The potato cultivars were used in the experiment

| Code | CIP code      | Code | CIP code      | Code     | CIP code / Cultivar |
|------|---------------|------|---------------|----------|---------------------|
| C4   | CIP392617.54  | C105 | CIP392032.2   | D107     | CIP395109.34        |
| C5   | CIP392634.52  | C106 | CIP392740.4   | D117     | CIP395448.1         |
| C10  | CIP393371.164 | C109 | CIP393613.2   | D119     | CIP396004.263       |
| C13  | CIP393280.64  | C112 | CIP397030.31  | D120     | CIP396004.337       |
| C15  | CIP391058.175 | C114 | CIP302428.20  | D131     | CIP396031.119       |
| C17  | CIP398192.213 | C115 | CIP302476.108 | D147     | CIP396241.4         |
| C20  | CIP398180.253 | C116 | CIP302499.30  | D148     | CIP396244.12        |
| C28  | CIP398208.58  | C122 | CIP304383.41  | D149     | CIP396268.1         |
| C29  | CIP398208.704 | C123 | CIP304383.80  | D160     | CIP397006.18        |
| C30  | CIP301024.14  | C124 | CIP304387.39  | D162     | CIP397039.53        |
| C31  | CIP301029.18  | C129 | CIP391930.1   | D166     | CIP398098.231       |
| C35  | CIP300054.29  | C130 | CIP391931.1   | D167     | CIP398098.570       |
| C44  | CIP385499.11  | C132 | CIP395438.1   | D168     | CIP398098.65        |
| C50  | CIP391382.18  | C133 | CIP394904.20  | D188     | CIP398208.670       |
| C53  | CIP392822.3   | D13  | CIP301045.74  | D189     | CIP399001.44        |
| C56  | CIP394034.65  | D17  | CIP303381.106 | D197     | CIP399062.118       |
| C57  | CIP394034.7   | D24  | CIP304351.31  | D199     | CIP399067.22        |
| C63  | CIP394614.117 | D31  | CIP304394.56  | D203     | CIP399075.32        |
| C65  | CIP395186.6   | D43  | CIP381403.16  | D210     | CIP399085.30        |
| C70  | CIP395432.51  | D53  | CIP391580.30  | D211     | CIP694474.16        |
| C72  | CIP395436.8   | D54  | CIP391585.179 | L3       | Longshu No.3        |
| C84  | CIP397065.2   | D55  | CIP391585.5   | L6       | Longshu No.6        |
| C85  | CIP397067.2   | D58  | CIP392285.72  | L10      | Longshu No.10       |
| C86  | CIP397069.5   | D67  | CIP393077.54  | L12      | Longshu No.12       |
| C89  | CIP397079.26  | D68  | CIP393079.24  | GN3      | Gannong No.3        |
| C91  | CIP397098.12  | D72  | CIP393220.54  | GN6      | Gannong No.6        |
| C95  | CIP397196.8   | D73  | CIP393242.50  | Shepody  | Shepody             |
| C97  | CIP398014.2   | D79  | CIP393349.68  | Atlantic | Atlantic            |
| C98  | CIP388611.22  | D87  | CIP393536.13  | FA       | Favorita            |
| C100 | CIP389468.3   | D88  | CIP393617.1   | QS9      | Qingshu No. 9       |
| C101 | CIP390637.1   | D96  | CIP395011.2   | D        | Désirée             |

**Table S2.** Effects of heat stress on potato tuberization parameters in vitro

| Cultivar | Explants with tubers (%) |         | Tuber number per jar |        | Tuber yield per jar (g) |            |
|----------|--------------------------|---------|----------------------|--------|-------------------------|------------|
|          | Control                  | HS      | Control              | HS     | Control                 | HS         |
| Désirée  | 66.67%                   | 0%      | 4±1.41               | 0±0    | 0.71±0.27               | 0±0        |
| C13      | 8.33%                    | 8.33%   | 1±1.41               | 1±1.41 | 0.33±0.47               | 0.31±0.44  |
| C15      | 33.33%                   | 16.67%  | 2±0                  | 2±0    | 0.38±0.085              | 0.27±0.028 |
| C17      | 100.00%                  | 66.67%  | 9±1.41               | 4±0    | 1.01±0.042              | 0.81±0.03  |
| C20      | 100.00%                  | 16.67%  | 6±0                  | 2±0    | 0.87±0.01               | 0.72±0.06  |
| C28      | 66.67%                   | 8.33%   | 4±0                  | 1±1.41 | 0.53±0.03               | 0.23±0.33  |
| C31      | 58.33%                   | 8.33%   | 7±1.41               | 1±1.41 | 0.68±0.06               | 0.57±0.81  |
| C44      | 91.67%                   | 83.33%  | 9±1.41               | 5±1.41 | 0.76±0.04               | 0.49±0.17  |
| C56      | 100.00%                  | 100.00% | 8±0                  | 8±1.41 | 0.97±0.06               | 0.77±0.06  |
| C57      | 100.00%                  | 16.67%  | 9±1.41               | 2±0    | 0.76±0.01               | 0.61±0.01  |
| C72      | 16.67%                   | 8.33%   | 2±2.83               | 1±1.41 | 0.37±0.52               | 0.16±0.22  |
| C84      | 100.00%                  | 16.67%  | 6±0                  | 2±0    | 0.68±0.06               | 0.37±0.01  |
| C85      | 66.67%                   | 33.33%  | 4±1.41               | 3±0    | 0.93±0.20               | 0.8±0.03   |
| C86      | 16.67%                   | 16.67%  | 2±0                  | 2±0    | 0.49±0.03               | 0.42±0.06  |
| C91      | 83.33%                   | 16.67%  | 5±1.41               | 2±0    | 0.93±0                  | 0.39±0.14  |
| C95      | 58.33%                   | 16.67%  | 7±1.41               | 2±0    | 0.45±0.06               | 0.22±0.04  |
| C98      | 66.67%                   | 16.67%  | 4±0                  | 2±0    | 0.95±0.06               | 0.71±0.07  |
| C100     | 66.67%                   | 25.00%  | 4±0                  | 3±0    | 0.8±0.10                | 0.43±0.04  |
| C105     | 100.00%                  | 8.33%   | 6±0                  | 1±1.41 | 0.69±0.04               | 0.11±0.16  |
| C106     | 100.00%                  | 25.00%  | 10±0                 | 3±0    | 0.85±0.04               | 0.63±0.03  |
| C109     | 83.33%                   | 25.00%  | 5±1.41               | 3±0    | 0.92±0.11               | 0.72±0.04  |
| C122     | 100.00%                  | 100.00% | 8±1.41               | 8±1.41 | 0.75±0.08               | 0.7±0.01   |
| C132     | 83.33%                   | 25.00%  | 5±1.41               | 3±0    | 0.69±0.18               | 0.48±0.03  |
| C133     | 66.67%                   | 8.33%   | 4±0                  | 1±1.41 | 0.72±0.04               | 0.18±0.25  |
| D13      | 16.67%                   | 16.67%  | 2±0                  | 2±0    | 0.27±0.01               | 0.23±0.01  |
| D17      | 100.00%                  | 25.00%  | 6±0                  | 3±0    | 0.87±0.07               | 0.55±0.07  |
| D24      | 100.00%                  | 25.00%  | 8±0                  | 3±0    | 0.74±0.06               | 0.51±0.01  |
| D54      | 66.67%                   | 8.33%   | 4±0                  | 1±1.41 | 0.69±0.03               | 0.24±0.34  |
| D58      | 100.00%                  | 25.00%  | 8±2.83               | 3±0    | 0.68±0.03               | 0.47±0.10  |
| D68      | 16.67%                   | 16.67%  | 2±0                  | 2±0    | 0.41±0.01               | 0.32±0.01  |
| D72      | 100.00%                  | 83.33%  | 6±0                  | 5±1.41 | 0.72±0                  | 0.72±0.11  |
| D73      | 100.00%                  | 66.67%  | 8±2.83               | 4±0    | 0.68±0.03               | 0.46±0.01  |
| D148     | 25.00%                   | 16.67%  | 3±0                  | 2±0    | 0.58±0.04               | 0.51±0.03  |
| D149     | 83.33%                   | 16.67%  | 5±1.41               | 2±0    | 0.86±0.08               | 0.46±0.03  |
| D162     | 100.00%                  | 25.00%  | 11±0                 | 3±0    | 1.86±0.07               | 0.67±0.16  |

|                  |         |        |           |           |           |           |
|------------------|---------|--------|-----------|-----------|-----------|-----------|
| D189             | 83.33%  | 25.00% | 5±1.41    | 3±0       | 0.75±0.11 | 0.67±0.06 |
| D211             | 16.67%  | 16.67% | 2±0       | 2±0       | 0.39±0.04 | 0.35±0    |
| L10              | 41.67%  | 41.67% | 5±0       | 5±0       | 0.9±0.11  | 0.83±0.10 |
| FA               | 58.33%  | 25.00% | 7±0       | 3±0       | 0.98±0.14 | 0.77±0.10 |
| Shepody          | 16.67%  | 16.67% | 3±0       | 2±0       | 0.58±0.07 | 0.3±0.01  |
| L6               | 25.00%  | 16.67% | 4±1.41    | 0±0       | 0.71±0.27 | 0±0       |
| Atlantic         | 100.00% | 25.00% | 1±1.41    | 1±1.41    | 0.33±0.47 | 0.31±0.44 |
| Average<br>value | 67.66%  | 27.98% | 5.40±2.53 | 2.77±1.76 | 0.73±0.27 | 0.48±0.22 |

---

HS, heat stress

**Table S3.** Heat tolerance coefficient (HTC) of each single index for 40 potato cultivars

| Cultivar | X <sub>1</sub> | X <sub>2</sub> | X <sub>3</sub> | X <sub>4</sub> | X <sub>5</sub> | X <sub>6</sub> | X <sub>7</sub> | X <sub>8</sub> | X <sub>9</sub> | X <sub>10</sub> | X <sub>11</sub> | X <sub>12</sub> | X <sub>13</sub> | X <sub>14</sub> |
|----------|----------------|----------------|----------------|----------------|----------------|----------------|----------------|----------------|----------------|-----------------|-----------------|-----------------|-----------------|-----------------|
| D        | 1.5            | 1.02           | 1.19           | 1.43           | 1.2            | 0.95           | 0.96           | 0.95           | 0.31           | 0.21            | 0.15            | 0.64            | 0.46            | 0.83            |
| C13      | 0.67           | 1.16           | 1.44           | 1.2            | 1.17           | 0.78           | 0.79           | 0.78           | 0.58           | 0.73            | 0.76            | 0.77            | 1               | 1.16            |
| C15      | 1.06           | 1.9            | 0.98           | 1.31           | 1.19           | 0.9            | 0.21           | 1.31           | 0.62           | 0.88            | 0.68            | 0.9             | 0.28            | 0.27            |
| C17      | 0.91           | 1.23           | 1.09           | 1.5            | 1.08           | 0.74           | 0.76           | 0.74           | 0.8            | 0.6             | 0.55            | 1.26            | 0.78            | 0.71            |
| C20      | 1.81           | 3.17           | 1.66           | 0.94           | 0.77           | 0.77           | 0.77           | 0.77           | 2.00           | 2.17            | 2.02            | 0.88            | 1.88            | 1.21            |
| C28      | 1.61           | 1.15           | 0.57           | 0.49           | 1.04           | 0.98           | 1.1            | 1.04           | 0.66           | 0.37            | 0.6             | 0.87            | 0.78            | 0.84            |
| C31      | 1.47           | 1.32           | 0.81           | 0.96           | 1.36           | 0.85           | 0.11           | 0.68           | 0.44           | 0.43            | 0.5             | 1.22            | 0.7             | 0.73            |
| C44      | 1.16           | 1.05           | 1.09           | 0.71           | 1.00           | 1.07           | 0.14           | 0.85           | 0.72           | 1.13            | 0.88            | 1.02            | 0.73            | 0.97            |
| C56      | 0.57           | 2.31           | 1.12           | 1.07           | 1.04           | 0.8            | 0.82           | 0.8            | 0.4            | 0.35            | 0.31            | 0.95            | 0.79            | 0.84            |
| C57      | 0.94           | 1.16           | 1.37           | 2.01           | 0.72           | 1.14           | 0.87           | 1.14           | 0.56           | 0.9             | 0.43            | 0.91            | 0.82            | 1.39            |
| C72      | 2.48           | 3.03           | 1.49           | 1.42           | 0.99           | 0.63           | 1.44           | 0.68           | 2.57           | 4.46            | 2.4             | 1.16            | 1.31            | 1.22            |
| C84      | 1.01           | 4.47           | 1.18           | 1.12           | 0.81           | 0.97           | 8.56           | 0.76           | 2.76           | 1.92            | 1.43            | 1.19            | 1.08            | 1.21            |
| C85      | 3.02           | 5.15           | 1.96           | 1.09           | 0.94           | 0.93           | 8.76           | 0.74           | 1.3            | 1.58            | 1.46            | 0.96            | 1.3             | 1.24            |
| C86      | 1.65           | 2.33           | 1.54           | 1.19           | 0.64           | 1.07           | 1.25           | 1.12           | 1.31           | 3.11            | 3.48            | 1.23            | 1.69            | 1.06            |
| C91      | 1.00           | 1.21           | 1.23           | 1.11           | 1.06           | 1.21           | 0.87           | 1.19           | 0.61           | 0.81            | 0.93            | 0.99            | 0.96            | 0.95            |
| C95      | 2.67           | 1.14           | 1.18           | 1.55           | 1.46           | 1.13           | 0.16           | 0.92           | 0.87           | 0.44            | 0.26            | 0.44            | 0.31            | 0.45            |
| C98      | 1.59           | 2.47           | 1.15           | 1.24           | 0.9            | 1              | 1.17           | 1.03           | 1.73           | 2.2             | 2.36            | 0.94            | 1.2             | 1.2             |
| C100     | 1.24           | 2.39           | 0.93           | 1.25           | 0.96           | 1.01           | 0.13           | 0.81           | 0.55           | 0.19            | 0.18            | 0.38            | 0.73            | 0.93            |
| C105     | 1.12           | 2.02           | 0.85           | 0.89           | 1.21           | 0.91           | 1.26           | 0.97           | 0.82           | 0.66            | 0.5             | 0.75            | 0.71            | 0.82            |
| C106     | 2.65           | 1.37           | 1.79           | 1.72           | 0.9            | 0.85           | 0.84           | 0.85           | 0.45           | 0.53            | 0.41            | 1.07            | 0.85            | 1.07            |
| C109     | 1.9            | 3.28           | 1.35           | 1.46           | 0.85           | 1.08           | 1.09           | 1.08           | 1.14           | 1.05            | 1.14            | 0.97            | 1.23            | 1.12            |
| C122     | 1.09           | 1.18           | 1.23           | 0.79           | 1.46           | 1.4            | 0.13           | 0.76           | 0.62           | 0.8             | 0.79            | 1               | 0.96            | 0.94            |
| C132     | 1.61           | 3.56           | 1.71           | 1.35           | 0.92           | 1.25           | 1.23           | 1.25           | 2.53           | 2.64            | 3.31            | 1.26            | 1.54            | 1.53            |
| C133     | 1.28           | 3.93           | 1.16           | 1.12           | 0.97           | 0.7            | 1.5            | 0.69           | 2.34           | 2.33            | 2.2             | 1.39            | 1.09            | 1.16            |
| D13      | 0.95           | 2.63           | 1.74           | 0.98           | 0.69           | 0.77           | 8.39           | 0.62           | 1.36           | 2.07            | 1.1             | 1.03            | 1.3             | 1.21            |
| D17      | 0.95           | 1.18           | 1.6            | 1.99           | 1.01           | 0.8            | 0.8            | 0.8            | 0.31           | 0.1             | 0.28            | 0.55            | 0.92            | 0.55            |
| D24      | 1.09           | 1.02           | 1.34           | 1.3            | 1              | 0.79           | 0.8            | 0.79           | 0.36           | 0.26            | 0.23            | 0.75            | 0.71            | 0.78            |
| D54      | 1.47           | 3.9            | 1              | 0.66           | 0.7            | 0.66           | 1.01           | 0.65           | 2.88           | 10.37           | 1.04            | 0.59            | 1.08            | 1.19            |
| D58      | 1.67           | 4.05           | 1.14           | 0.68           | 0.86           | 0.95           | 1.01           | 0.96           | 1.66           | 1.88            | 2.38            | 1.05            | 1.27            | 1.2             |
| D68      | 1.03           | 1.1            | 1.6            | 1.02           | 1.01           | 1.15           | 0.83           | 1.16           | 0.39           | 0.32            | 0.32            | 0.91            | 0.8             | 1.11            |
| D72      | 3.22           | 1.06           | 0.65           | 0.86           | 1.04           | 0.66           | 0.66           | 0.66           | 0.15           | 0.06            | 0.09            | 2.62            | 0.9             | 0.94            |
| D73      | 1.08           | 3.56           | 1.21           | 0.82           | 0.93           | 1.13           | 1.03           | 1.17           | 4.09           | 10              | 6.47            | 1.05            | 1.5             | 1.11            |
| D148     | 1.61           | 4.18           | 1.18           | 0.82           | 0.76           | 0.91           | 8.65           | 0.73           | 1.47           | 1.78            | 2.54            | 2.14            | 1.31            | 1.05            |
| D149     | 1.63           | 2.94           | 0.85           | 0.84           | 0.65           | 1.1            | 7.23           | 0.89           | 3.83           | 11.74           | 0.08            | 1.1             | 1.19            | 1.03            |
| D162     | 1.71           | 4.21           | 1.83           | 0.74           | 0.83           | 1              | 7.35           | 0.81           | 1.23           | 1.45            | 2.28            | 0.77            | 1.58            | 1.35            |
| D189     | 1.66           | 2.89           | 0.8            | 0.59           | 1.52           | 1.03           | 0.94           | 0.75           | 1.01           | 0.9             | 0.77            | 1.15            | 0.96            | 0.89            |

|               |      |      |      |      |      |      |      |      |      |      |      |      |      |      |
|---------------|------|------|------|------|------|------|------|------|------|------|------|------|------|------|
| D211          | 0.55 | 1.5  | 0.55 | 0.68 | 1.08 | 0.86 | 0.11 | 0.68 | 0.37 | 0.27 | 0.37 | 0.99 | 0.75 | 0.74 |
| L10           | 1.76 | 1.69 | 1.29 | 2.02 | 1.19 | 1.04 | 0.83 | 0.99 | 0.54 | 0.71 | 0.62 | 1.4  | 0.46 | 0.69 |
| FA            | 5.42 | 5.17 | 0.55 | 0.37 | 0.67 | 1.22 | 1.22 | 1.22 | 2.69 | 4.61 | 2.72 | 1.04 | 1.5  | 2.6  |
| L6            | 1.18 | 1.21 | 0.15 | 0.8  | 1.26 | 0.82 | 0.86 | 0.83 | 0.54 | 0.63 | 0.86 | 0.85 | 1.75 | 0.99 |
| Average value | 1.57 | 2.38 | 1.19 | 1.1  | 1    | 0.95 | 1.92 | 0.89 | 1.24 | 1.94 | 1.25 | 1.03 | 1.03 | 1.03 |
| CV            | 0.56 | 0.54 | 0.33 | 0.37 | 0.23 | 0.19 | 1.41 | 0.22 | 0.81 | 1.42 | 1.02 | 0.38 | 0.38 | 0.35 |

X<sub>1</sub>, X<sub>2</sub>, X<sub>3</sub>, X<sub>4</sub>, X<sub>5</sub>, X<sub>6</sub>, X<sub>7</sub>, X<sub>8</sub>, X<sub>9</sub>, X<sub>10</sub>, X<sub>11</sub>, X<sub>12</sub>, X<sub>13</sub>, X<sub>14</sub> represent plant height growth rate, fourth internode growth rate, aerial parts fresh weight, aerial parts dry weight, (%) injury cell membrane, chlorophyll a, chlorophyll b, total chlorophyll, Pn, Gs, Tr, Ci, tuber number and tuber yield, respectively.
